# Supplementary material
Source: publisher figshare collection journal article supplement (https://acs.figshare.com/ndownloader/files/22414329)
Supplement: Supplementary file 1 [file 22414329]

## **Reusable and Recyclable Graphene Masks with Outstanding Superhydrophobic and Photothermal Performances**

Hong Zhong<sup>1</sup>, Zhaoran Zhu<sup>1</sup>, Jing Lin<sup>1</sup>, Chi Fai Cheung<sup>1</sup>, Vivien L. Lu<sup>2</sup>, Feng Yan<sup>3</sup>, Ching-Yuen Chan<sup>1</sup>, Guijun Li<sup>1\*</sup>

<sup>1</sup>State Key Laboratory of Ultra-Precision Machining Technology, Department of Industrial and Systems Engineering, The Hong Kong Polytechnic University, Kowloon, Hong Kong, China

<sup>2</sup>Department of Building Services Engineering, The Hong Kong Polytechnic University, Kowloon, Hong Kong, China

<sup>3</sup>Department of Applied Physics, The Hong Kong Polytechnic University, Kowloon, Hong Kong, China

Email: [mitch.li@polyu.edu.hk](mailto:mitch.li@polyu.edu.hk)

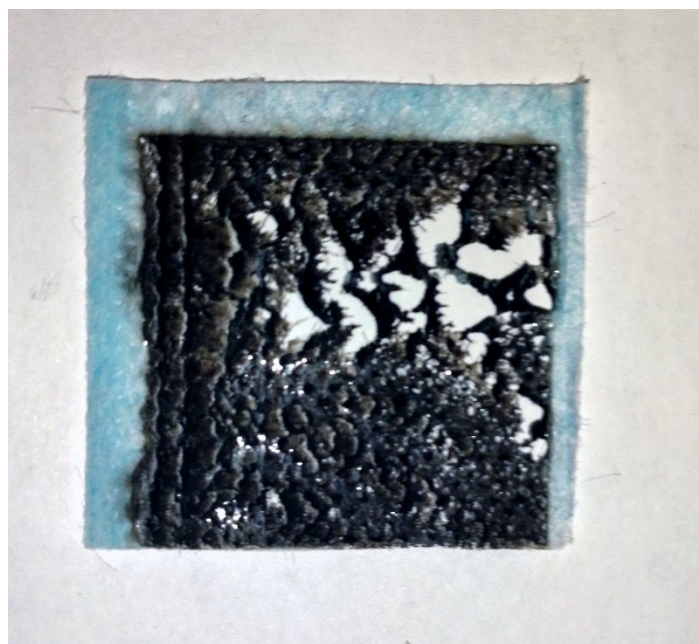

Figure S1. Optical image of the mask after 3<sup>rd</sup> generation CW-LIFT graphene. Due to the high temperature with the CW laser, the mask was melted.

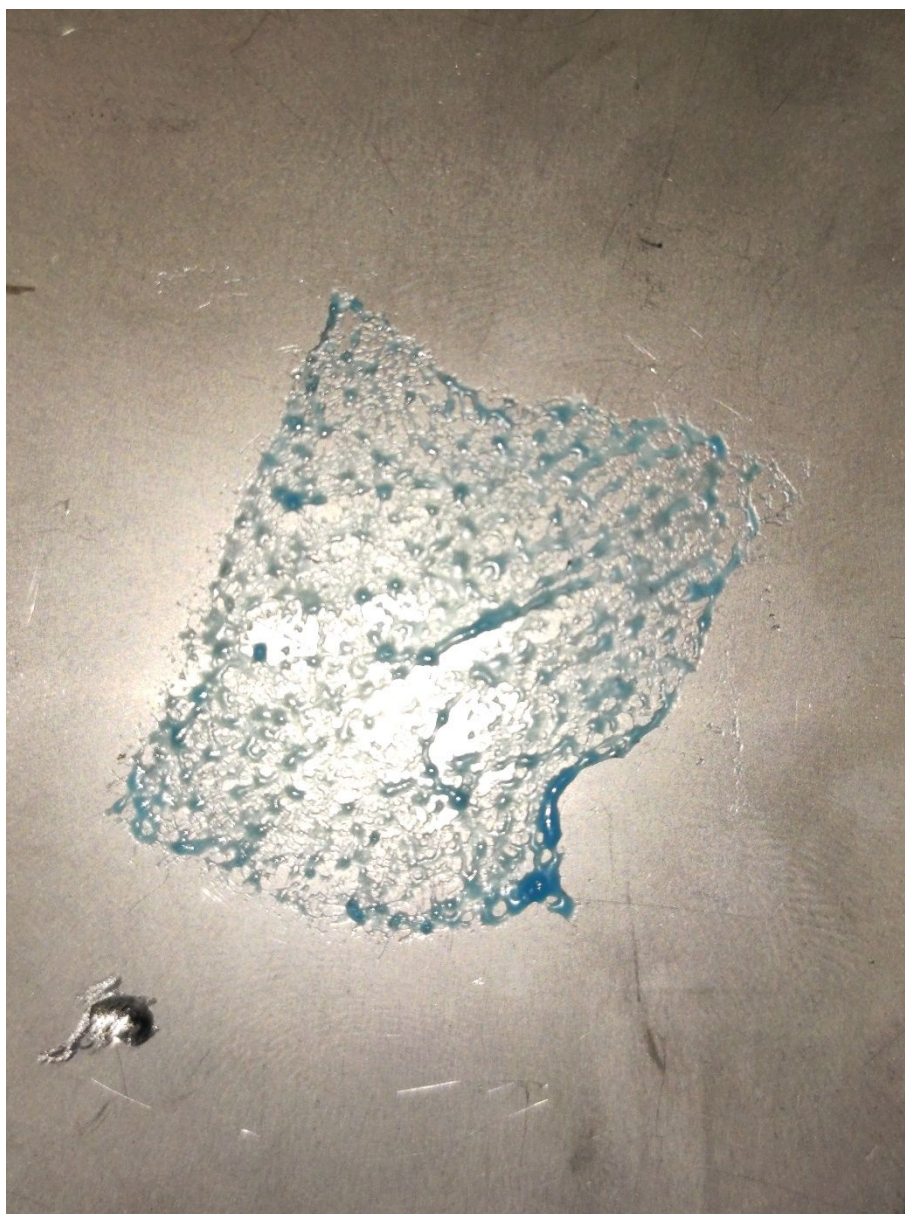

Figure S2. The optical image of the melted mask. After heating at 130 °C using hotplate, the pristine mask had melted.

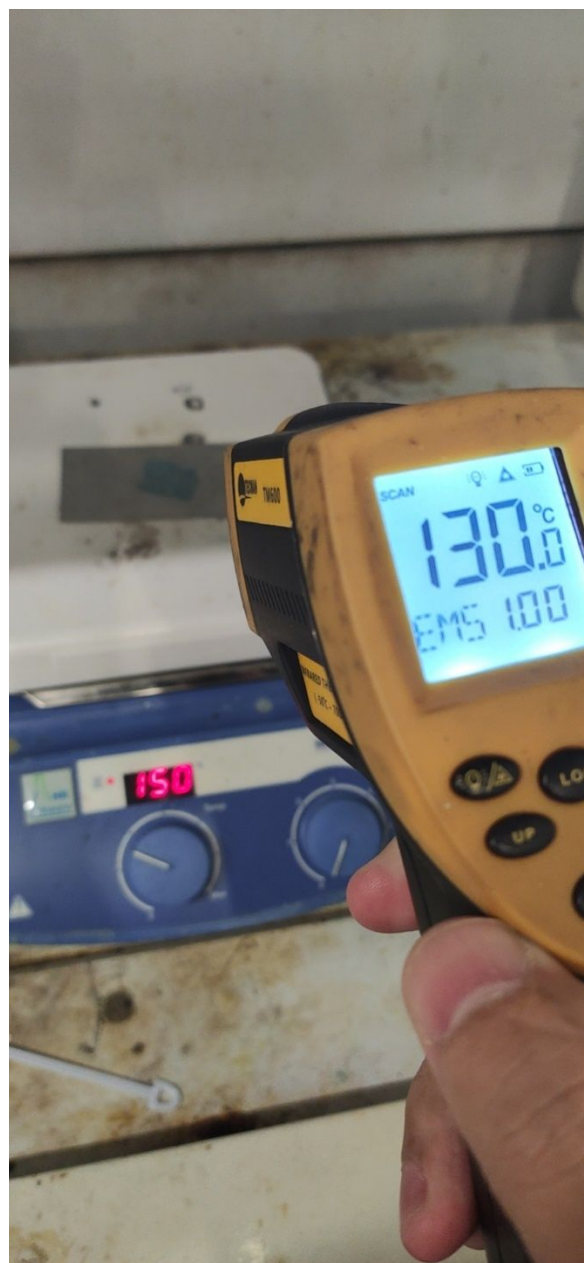

Figure S3. The experimental setup for measuring the melting point of the pristine mask. The hotplate was set to 150 °C, and the surface temperature of the pristine mask was measured to be 130 °C.

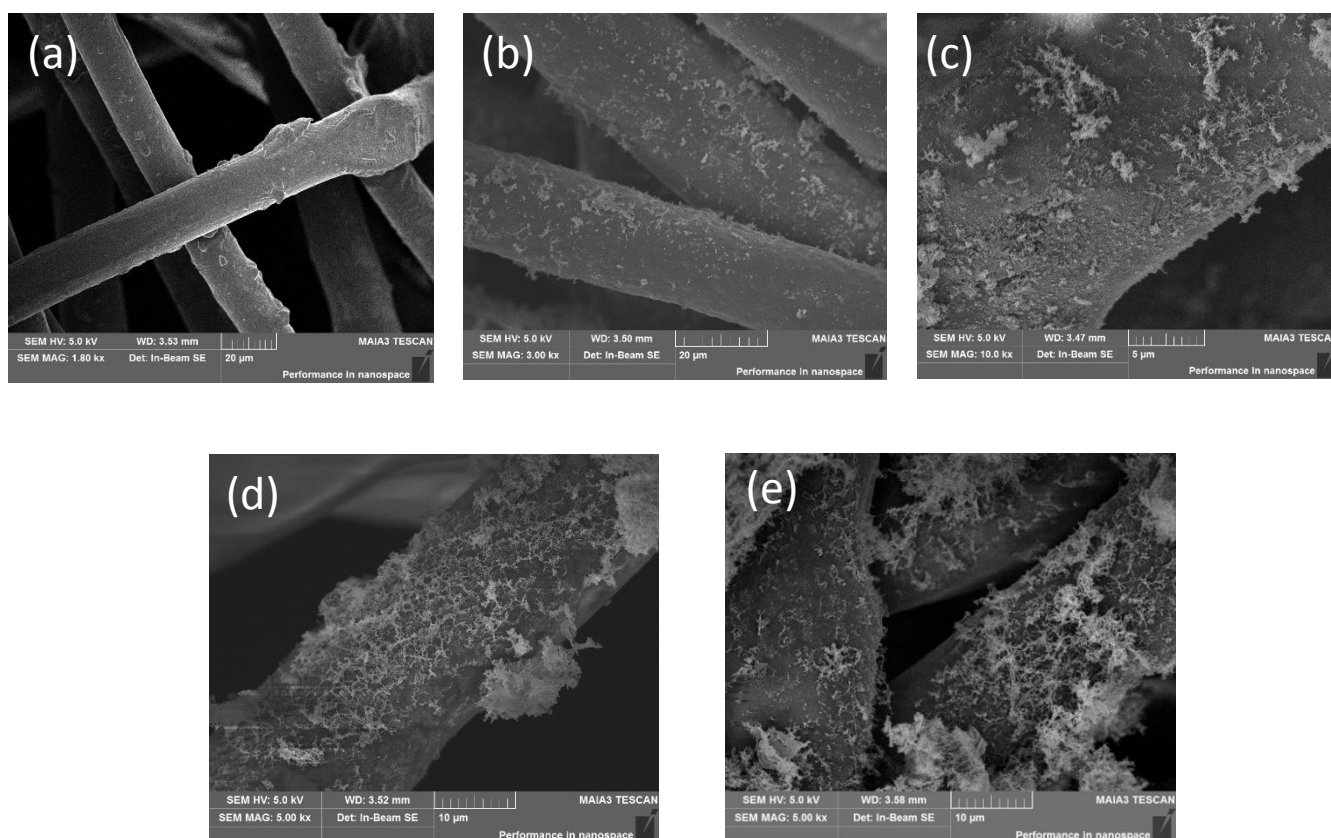

Figure S4. SEM images for (a) Pristine mask. (b) Mask with graphene no aging test. (c) Mask with graphene 24 h aging test. (d) Mask with graphene 48 h aging test. (e) Mask with graphene 72 h aging test.

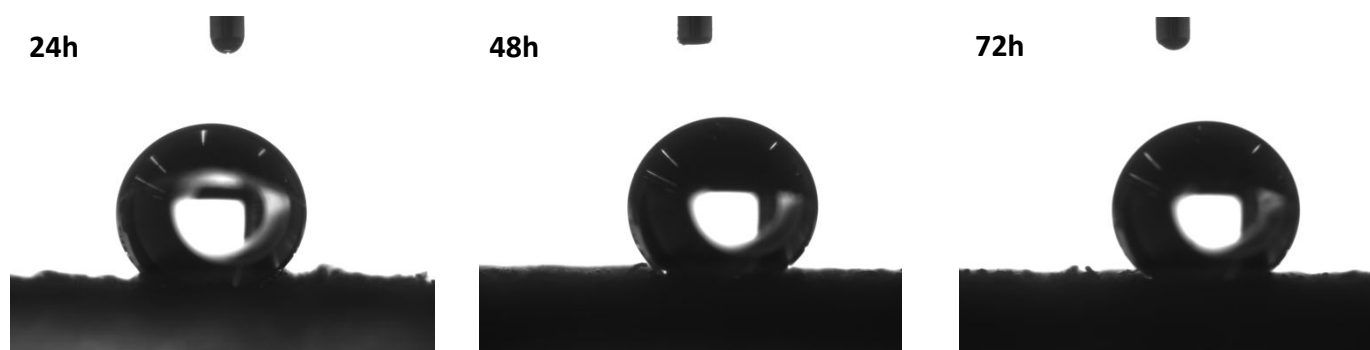

Figure S5. The water contact angles of the masks after solar sterilization after 24 h, 48 h and 72 h with 1 sun intensity.

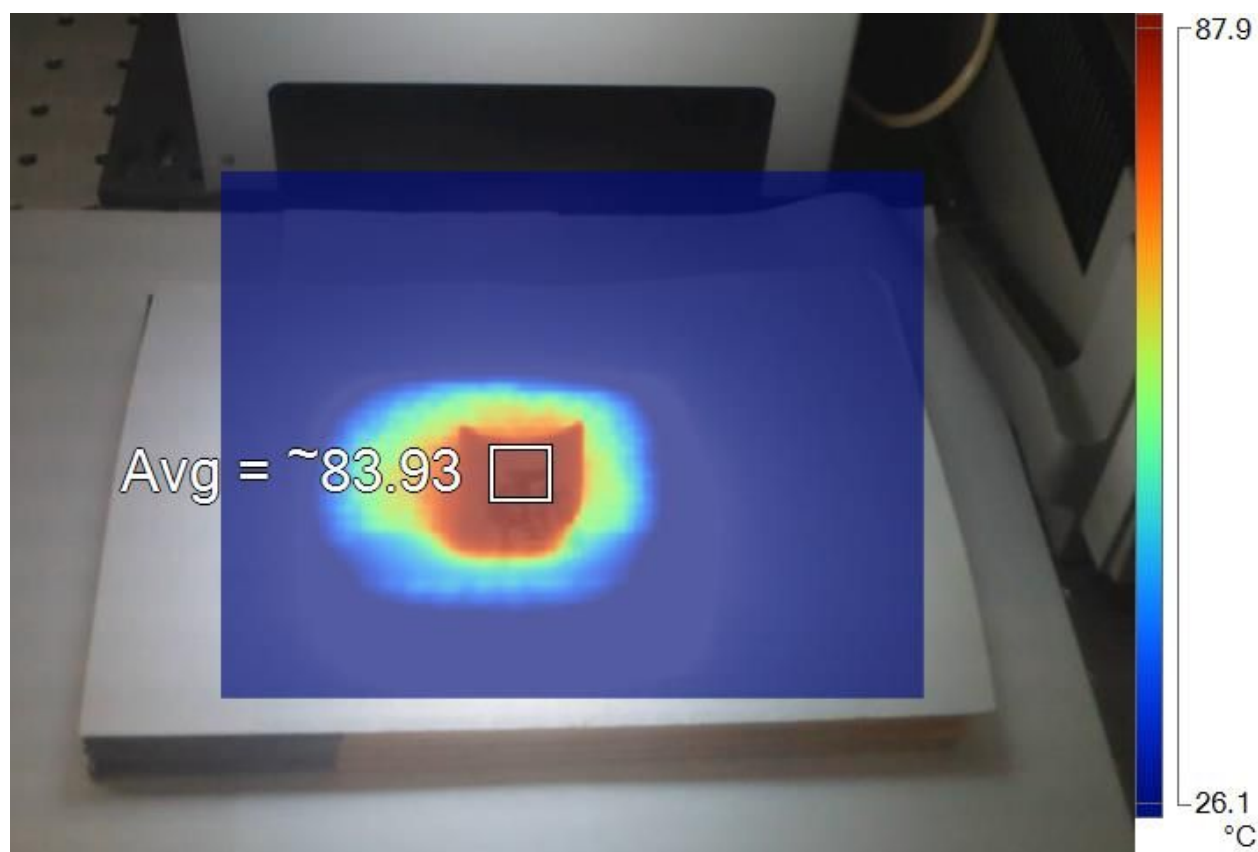

Figure S6. IR image of a 3.7 cm by 3.7 cm graphene coated mask sample after 72 h solar sterilization, under 1 sun intensity.

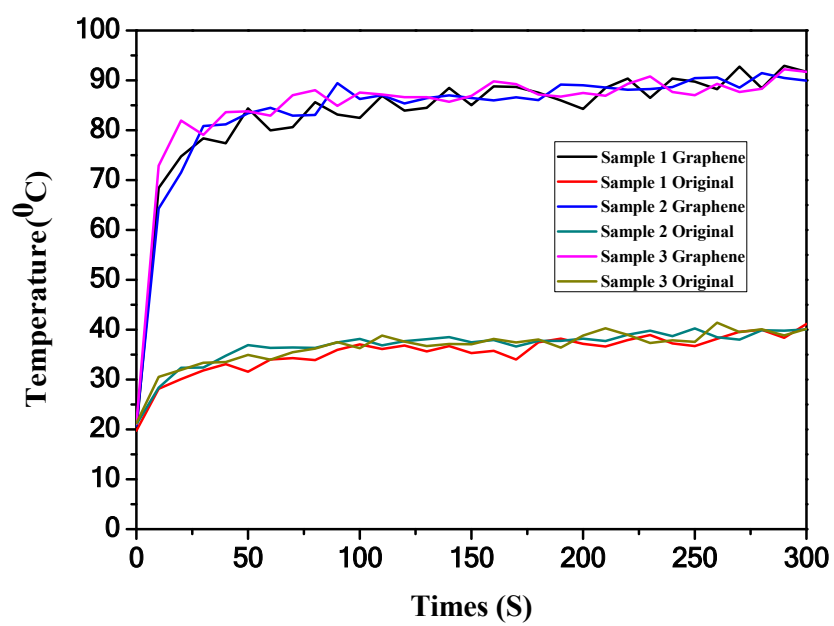

Figure S7. The measured temperature of graphene coated mask and the pristine masks against time.



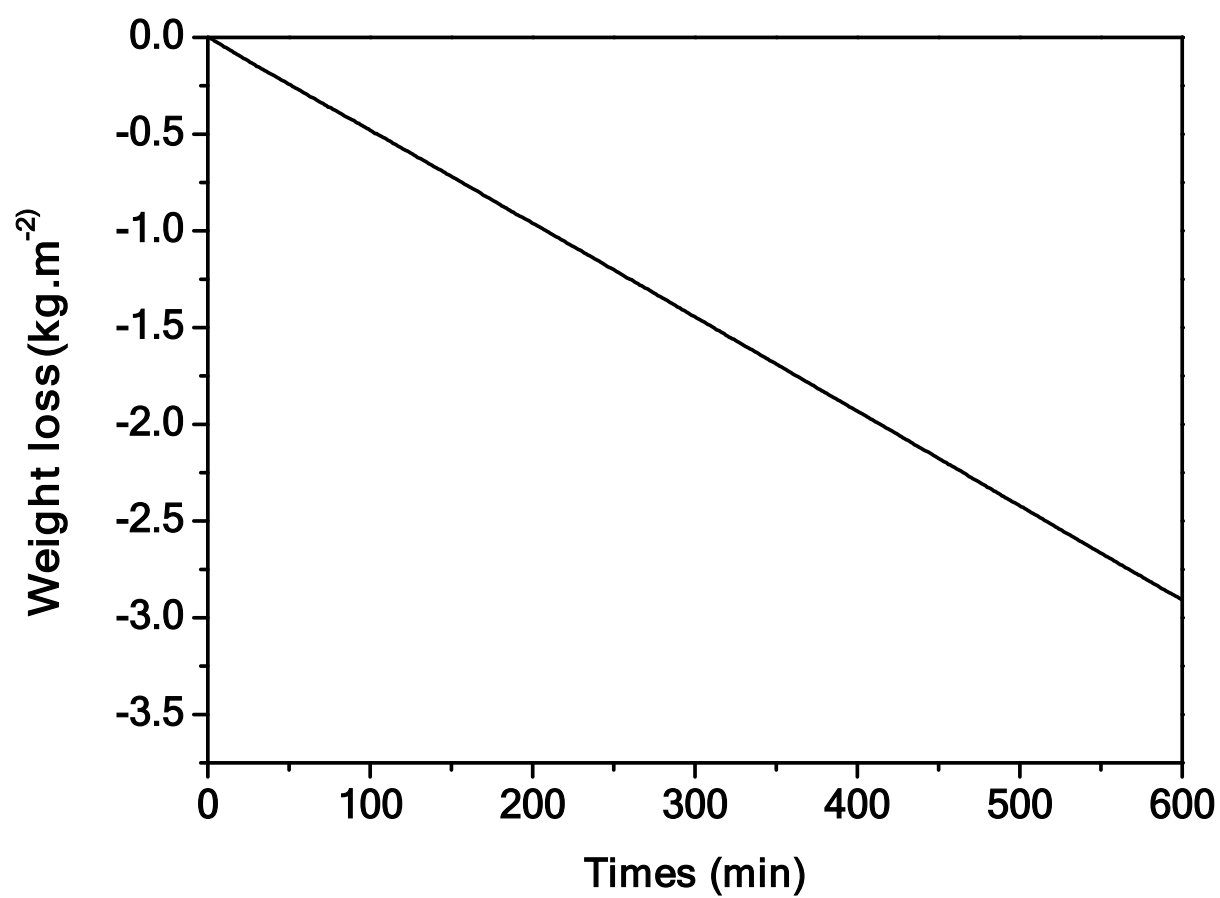

Figure S8. The desalination efficient of original mask, which is 0.29 kg/m<sup>2</sup>h.



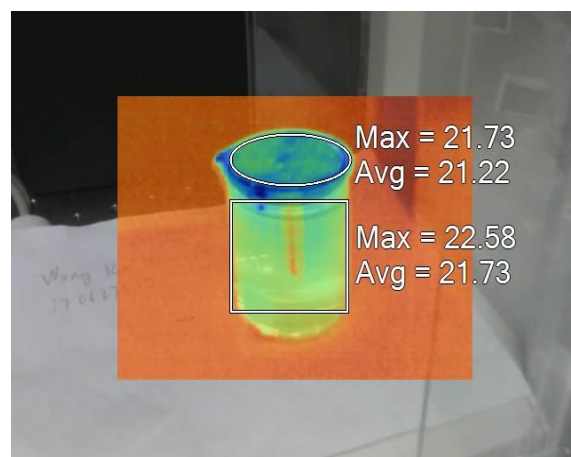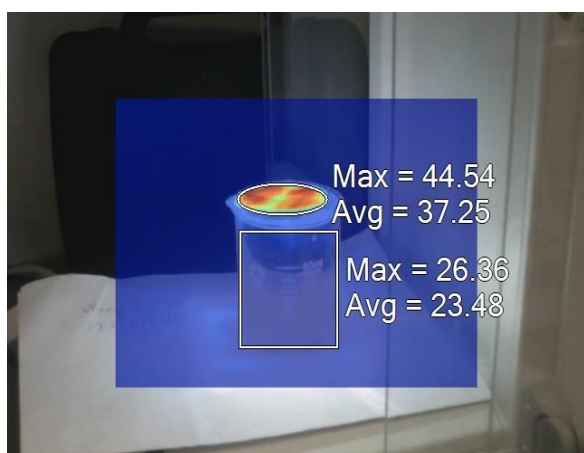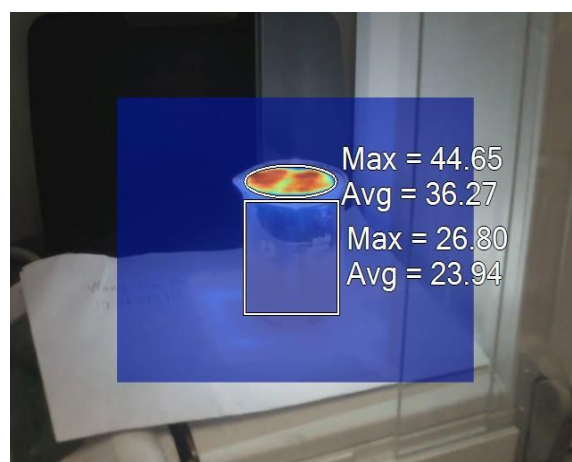

Figure S9. Solar steam generator (upper: before desalination; bottom: during desalination).
